# Supplementary material for: Reducing office workers’ sitting time: rationale and study design for the Stand Up Victoria cluster randomized trial
Source: PubMed Central journal article supplement (PMC3828481; doi:10.1186/1471-2458-13-1057), 2013-11-09
Supplement: 1471-2458-13-1057-S9.pdf [file 1471-2458-13-1057-S9.pdf]

**Adverse Events**

**1. Have you experienced any health problem(s) in the past 3 months which you believe is/are related to your participation in the study? (please circle answer)**

No (you have now completed this form)

Yes (please complete questions below)

**2. Please list health problem(s) below – one per line**

(You may list up to three separate health problems below.)

|    |
|----|
| 1. |
| 2. |
| 3. |

**3. Was treatment sought from a health provider for this/these problems? (please circle answer)**

No (you have now completed this form)

Yes (please complete questions below)

**4. Please select type(s) of health providers and indicate number of visits:**

| Treatment type             | Tick all that apply      | Number of visits |
|----------------------------|--------------------------|------------------|
| General Practitioner (GP)  | <input type="checkbox"/> |                  |
| Massage therapist          | <input type="checkbox"/> |                  |
| Occupational therapist     | <input type="checkbox"/> |                  |
| Optometrist                | <input type="checkbox"/> |                  |
| Orthotist / Prosthetist    | <input type="checkbox"/> |                  |
| Podiatrist                 | <input type="checkbox"/> |                  |
| Physiotherapist            | <input type="checkbox"/> |                  |
| Radiographer / Radiologist | <input type="checkbox"/> |                  |
| Sonographer                | <input type="checkbox"/> |                  |
| Other (please specify)     |                          |                  |

*The above materials have been developed for use within the Stand Up Victoria study. Any future use of these materials must be referenced to this article.*
