# Supplementary material for: Reducing office workers’ sitting time: rationale and study design for the Stand Up Victoria cluster randomized trial
Source: BMC Public Health. 2013 Nov 9;13:1057. doi: 10.1186/1471-2458-13-1057 (PMC3828481; doi:10.1186/1471-2458-13-1057)
Supplement: Additional file 8: Figure S7 — Mediator/Moderator questions. [file 1471-2458-13-1057-S8.pdf]

***For the following questions, we would like you to think how you felt in the past month. Please answer the following questions by ticking the appropriate box.***

**1. Tick the box that best applies to you:**

|                                                                                                  | None<br>of the<br>time   | 10-30%<br>of the<br>time | 30-50%<br>of the<br>time | 50-80%<br>of the<br>time | 80-<br>100%<br>of the<br>time |
|--------------------------------------------------------------------------------------------------|--------------------------|--------------------------|--------------------------|--------------------------|-------------------------------|
| a. if you were given a choice, how much time would you like to spend <u>sitting</u> at work?     | <input type="checkbox"/>      |
| b. if you were given a choice, how much time would you like to spend <u>standing</u> up at work? | <input type="checkbox"/>      |

**2. Please indicate how much you agree or disagree with the following statements:**

|                                                                                                                                          | Strongly<br>Disagree     | Disagree                 | Not Sure                 | Agree                    | Strongly<br>Agree        |
|------------------------------------------------------------------------------------------------------------------------------------------|--------------------------|--------------------------|--------------------------|--------------------------|--------------------------|
| a. sitting for most of the time at work does not impact on my health                                                                     | <input type="checkbox"/> |
| b. sitting for most of the time at work is bad for my health                                                                             | <input type="checkbox"/> |
| c. any health impact of sitting for most of the time at work can be off-set by exercising at other times of the day                      | <input type="checkbox"/> |
| d. it is beneficial for my health to stand up at least once every 30 minutes while I am at work                                          | <input type="checkbox"/> |
| e. it is beneficial for my health if I am as active as possible throughout my working day (e.g. by using the stairs instead of the lift) | <input type="checkbox"/> |

**3. Please indicate how much you agree or disagree with the following statements:**

|                                                                                                              | Strongly Disagree        | Disagree                 | Not Sure                 | Agree                    | Strongly Agree           |
|--------------------------------------------------------------------------------------------------------------|--------------------------|--------------------------|--------------------------|--------------------------|--------------------------|
| a. it is my choice whether I stand up or sit at my desk while at work                                        | <input type="checkbox"/> |
| b. it is my choice whether I stand up or sit during a meeting with <u>colleagues</u> at work                 | <input type="checkbox"/> |
| c. it is my choice whether I stand up or sit during a meeting with my <u>supervisor/s</u> at work            | <input type="checkbox"/> |
| d. it is my choice whether I walk over to talk to a <u>colleague</u> ( <i>iMail</i> ) or send them an eMail  | <input type="checkbox"/> |
| e. it is my choice whether I walk over to talk to a <u>supervisor</u> ( <i>iMail</i> ) or send them an eMail | <input type="checkbox"/> |

**4. Please indicate how much you agree or disagree with the following statements:**

|                                                                                          | Strongly Disagree        | Disagree                 | Not Sure                 | Agree                    | Strongly Agree           |
|------------------------------------------------------------------------------------------|--------------------------|--------------------------|--------------------------|--------------------------|--------------------------|
| a. my workplace is committed to supporting staff health and well-being                   | <input type="checkbox"/> |
| b. my workplace is committed to supporting staff choices to stand or move more at work   | <input type="checkbox"/> |
| c. my <u>colleagues</u> would not mind if I chose to stand up while working at my desk   | <input type="checkbox"/> |
| d. my <u>supervisor/s</u> would not mind if I chose to stand up while working at my desk | <input type="checkbox"/> |
| e. my <u>colleagues</u> would not mind if I chose to stand during a work meeting         | <input type="checkbox"/> |

|    |                                                                                                                                   |                          |                          |                          |                          |                          |
|----|-----------------------------------------------------------------------------------------------------------------------------------|--------------------------|--------------------------|--------------------------|--------------------------|--------------------------|
| f. | my <u>supervisor/s</u> would not mind if I chose to stand during a work meeting                                                   | <input type="checkbox"/> |
| g. | my <u>colleagues</u> would not mind if I chose to walk over and talk to them ( <i>iMail</i> ) rather than sending them an eMail   | <input type="checkbox"/> |
| h. | my <u>supervisor/s</u> would not mind if I chose to walk over and talk to them ( <i>iMail</i> ) rather than sending them an eMail | <input type="checkbox"/> |

**5. The next questions are about how often you used various strategies to help you stand up at work. In the past month I have:**

|                                                                                                                                     | Never                    | Rarely                   | Some-times               | Often                    | Very Often               |
|-------------------------------------------------------------------------------------------------------------------------------------|--------------------------|--------------------------|--------------------------|--------------------------|--------------------------|
| a. thought about how much I sit at work                                                                                             | <input type="checkbox"/> |
| b. recorded my sitting or standing at work in a written record                                                                      | <input type="checkbox"/> |
| c. paid attention to specific things to help me stand at work (e.g., I have more energy in the morning so I stand during this time) | <input type="checkbox"/> |
| d. set short-term goals (daily or weekly) related to how often I stand up at work                                                   | <input type="checkbox"/> |
| e. broken down larger goals into smaller, more manageable goals (e.g. accumulate 40 minutes of standing in 4 x10minute bouts)       | <input type="checkbox"/> |
| f. thought about my standing goals                                                                                                  | <input type="checkbox"/> |
| g. reminded myself of the health benefits of standing at work (e.g., reduced risk of Type 2 diabetes, premature death)              | <input type="checkbox"/> |
| h. scheduled specific times to stand up at work                                                                                     | <input type="checkbox"/> |
| i. paid attention to barriers which got in the way of my standing at work                                                           | <input type="checkbox"/> |
| j. planned ways to overcome barriers to my standing at work                                                                         | <input type="checkbox"/> |

6. The next questions are about how often you used various strategies to help you stand up at work. If you haven't had a chance to use these strategies yet, please indicate 'Never' in the questions below. In the ***past month*** I have:

|                                                                                                | Never                    | Rarely                   | Some-<br>times           | Often                    | Very<br>Often            |
|------------------------------------------------------------------------------------------------|--------------------------|--------------------------|--------------------------|--------------------------|--------------------------|
| a. moved my workstation from sitting to standing or vice versa                                 | <input type="checkbox"/> |
| b. used my workstation tracker to record the days that I reach my standing goal at work        | <input type="checkbox"/> |
| c. used my workstation tracker to record my strategies for standing up and moving more at work | <input type="checkbox"/> |
| d. used an on-line timer to time my periods of sitting or standing                             | <input type="checkbox"/> |
| e. stood up when someone approached me at my workstation                                       | <input type="checkbox"/> |
| f. stood up when my phone rings                                                                | <input type="checkbox"/> |
| g. walked to talk to a colleague ( <i>iMail</i> ) rather than sending them an eMail            | <input type="checkbox"/> |
| h. walked to the printer that is further away from my workstation                              | <input type="checkbox"/> |
| i. walked to the bathroom that is further away from my workstation                             | <input type="checkbox"/> |

7. The next questions ask about your confidence in undertaking various activities. You may not have tried the activities listed - that is okay - but please still answer every question.

In the ***past month***, if you were trying to reduce your sitting time at work, how confident would you have been that you could have:

|                                                                              | Not at all<br>confident  | Slightly<br>confident    | Somewhat<br>confident    | Confident                | Very<br>confident        |
|------------------------------------------------------------------------------|--------------------------|--------------------------|--------------------------|--------------------------|--------------------------|
| a. stood up during meetings at work, even though no one else was             | <input type="checkbox"/> |
| b. stood up during meetings at work, even when supervisors were sitting down | <input type="checkbox"/> |

|                                                                                            |                          |                          |                          |                          |                          |
|--------------------------------------------------------------------------------------------|--------------------------|--------------------------|--------------------------|--------------------------|--------------------------|
| c. stood up at your desk at work, even though your colleagues were not                     | <input type="checkbox"/> |
| d. stood up at your desk at work, even when you felt tired                                 | <input type="checkbox"/> |
| e. stood up at your desk at work, even if your footwear was uncomfortable                  | <input type="checkbox"/> |
| f. stood up at your desk at work, even though you were really busy at work                 | <input type="checkbox"/> |
| g. stood up at your desk at work, even when your tasks required looking at multiple papers | <input type="checkbox"/> |
| h. stood up at your desk at work, even when your tasks required talking on the phone       | <input type="checkbox"/> |
| i. walk to talk to a colleague at work instead of emailing them, even though others didn't | <input type="checkbox"/> |

*The above materials have been developed for use within the Stand Up Victoria study. Any future use of these materials must be referenced to this article.*
